# Supplementary material for: Genomic and immune landscape Of metastatic pheochromocytoma and paraganglioma
Source: PubMed Central journal article supplement (PMC9975198; doi:10.1038/s41467-023-36769-6), 2023-02-28
Supplement: 41467_2023_36769_MOESM3_ESM.pdf [file 41467_2023_36769_MOESM3_ESM.pdf]

### **Description of Additional Supplementary Files**

File Name: Supplementary Data 1

Description: Receiver operating characteristic curve analysis showing the classification power of different markers of mPPGL. AUC, 95% confidence interval (CI) and sensitivity/specificity per each of the 511 classifiers.
